# Supplementary material
Source: HighWire-hosted journal article supplement (https://jnm.snmjournals.org/highwire/filestream/94705/field_highwire_adjunct_files/0/149997_Supplemental_Data.pdf)
Supplement: 149997_Supplemental_Data.pdf [file 149997_Supplemental_Data.pdf]

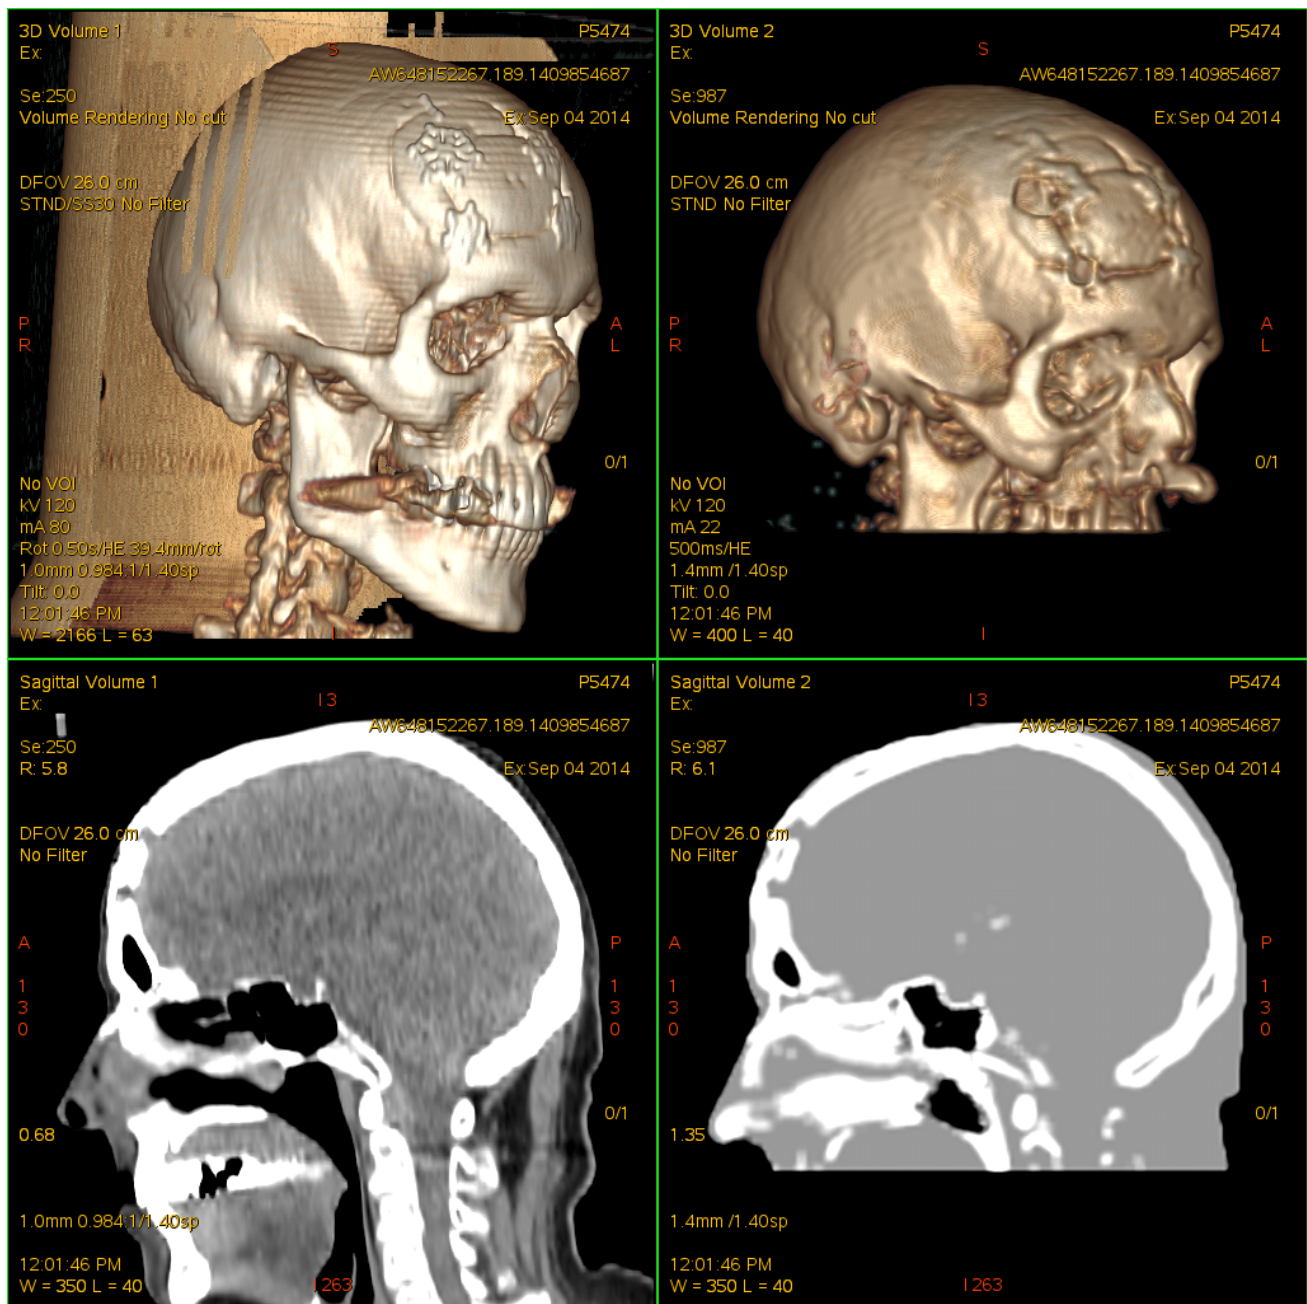

**Supplemental Figure 1:** Volume rendering and sagittal views of a CT dataset (left) and the corresponding segmented ZTE dataset (right). Notice craniotomy site.

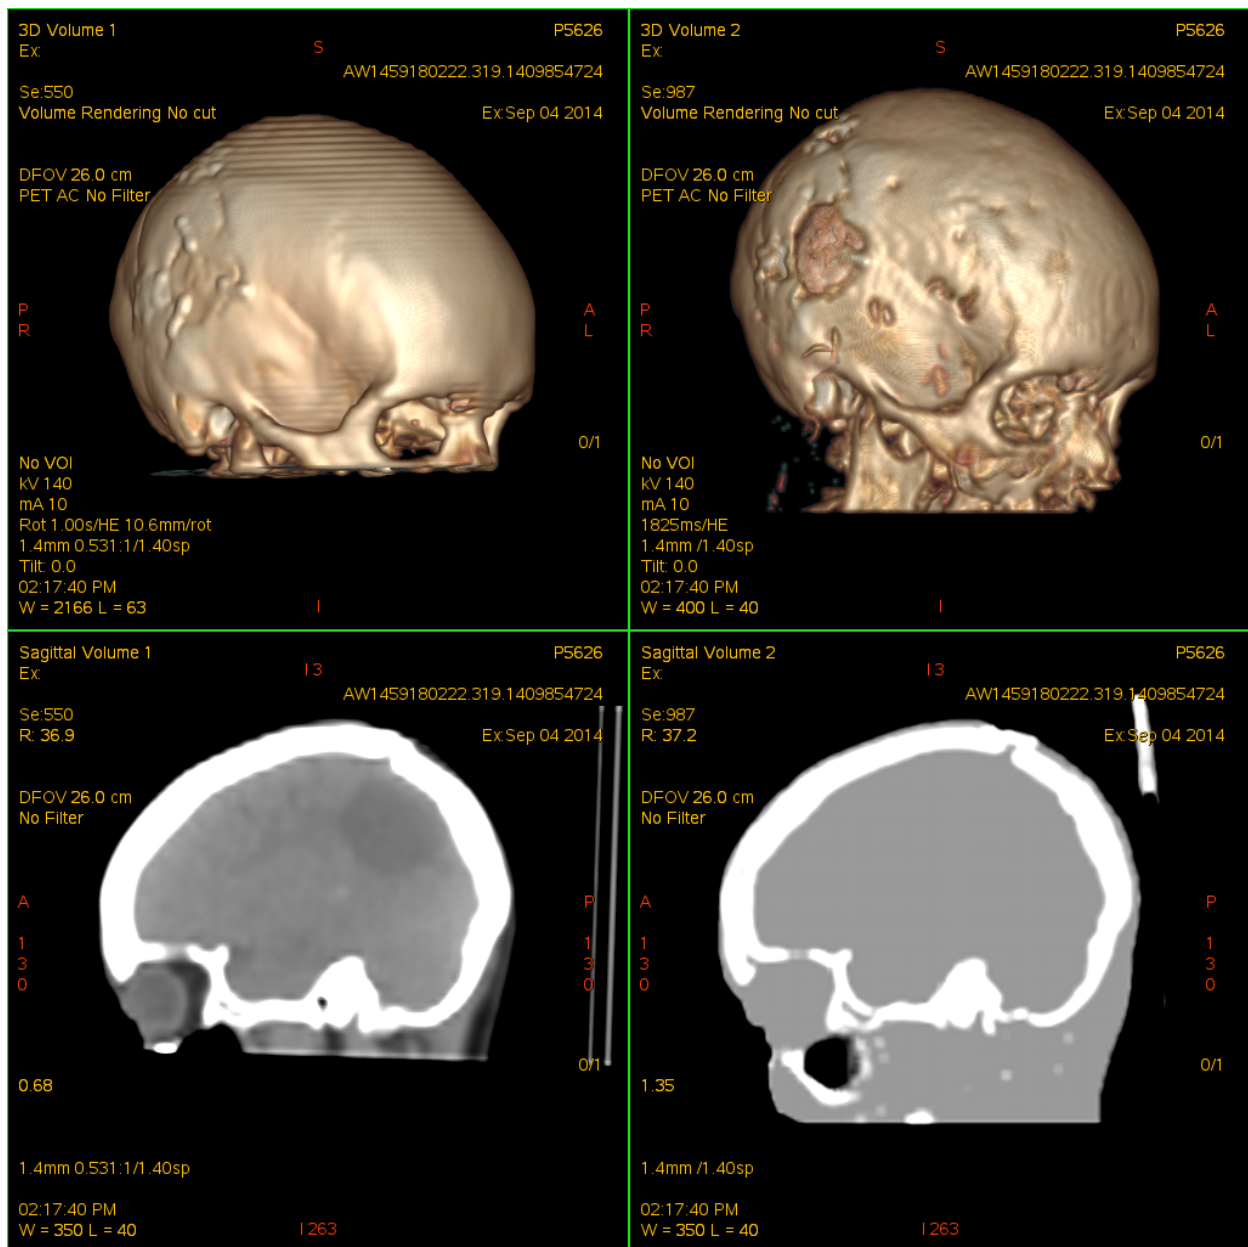

**Supplemental Figure 2:** Volume rendering and sagittal views of a CT dataset (left) and the corresponding segmented ZTE dataset (right). Notice craniotomy site.
